# Supplementary material for: Stacking fault stabilization and strengthening mechanisms in CoCrNi alloys
Source: Royal Society of Chemistry journal article supplement (doi:10.1039/d5ce01029b), 2026-01-01
Supplement: d5ce01029b1.pdf [file d5ce01029b1.pdf]

## Supplemental Materials for

### Stacking Fault Stabilization and Strengthening Mechanisms in CoCrNi Alloys

Shiyi Wang <sup>a</sup>, Tao Fu <sup>a, b, \*</sup>, Mengye Duan <sup>a</sup>, Hao Hu <sup>a</sup>, Xu Shen <sup>a</sup>,

Lingbao Hu <sup>a</sup>, Shayuan Weng <sup>c, \*</sup>, Xianghe Peng <sup>a, \*</sup>

<sup>a</sup> *Department of Engineering Mechanics, Chongqing University, Chongqing 400044, China*

<sup>b</sup> *State Key Laboratory of Coal Mining Disaster Dynamics and Control, Chongqing University,  
Chongqing, 400044, China*

<sup>c</sup> *College of Mechanical and Electrical Engineering, Hohai University, Changzhou, 213022, China*

#### **\*Corresponding authors.**

Address: Department of Engineering Mechanics, Chongqing University, Chongqing 400044, China

E-mails: futao@cqu.edu.cn (T. F.); syweng@hhu.edu.cn (S. W.); xhpeng@cqu.edu.cn (X. P.)

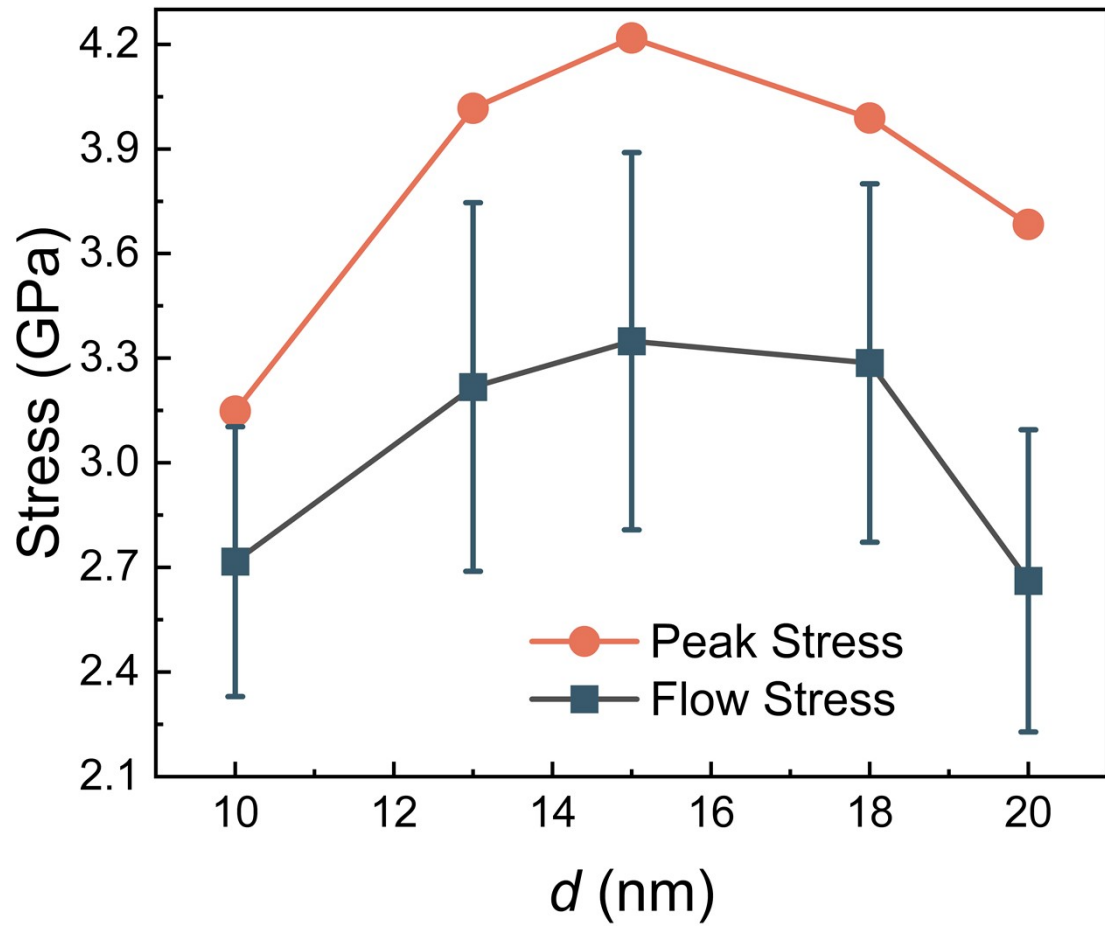

Fig. S1 Variation of peak and average flow stress of CoCrNi with  $d$  at  $\lambda = 5.54$  nm.
